# Supplementary material for: Novel AChE Inhibitors for Sustainable Insecticide Resistance Management
Source: PubMed Central journal article supplement (PMC3466212; doi:10.1371/journal.pone.0047125), 2012-10-08

G119S AChE1

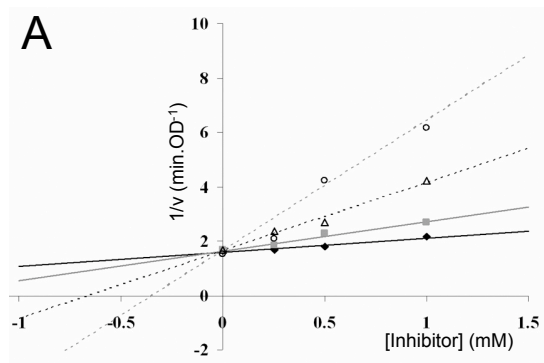

wt AChE1

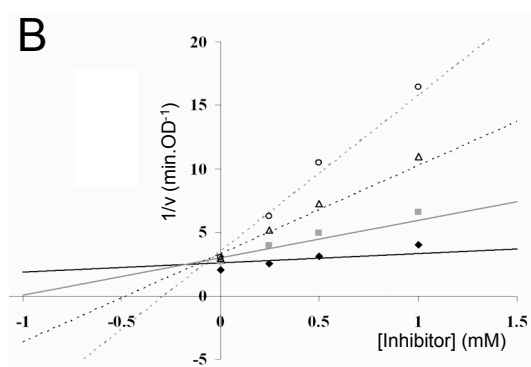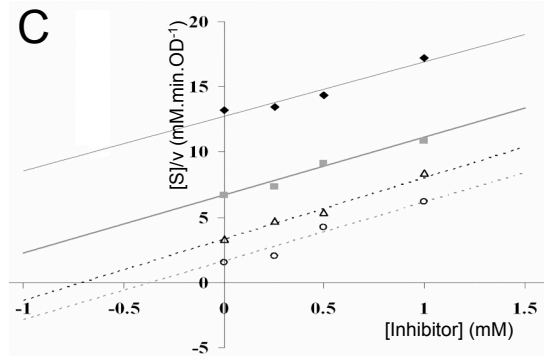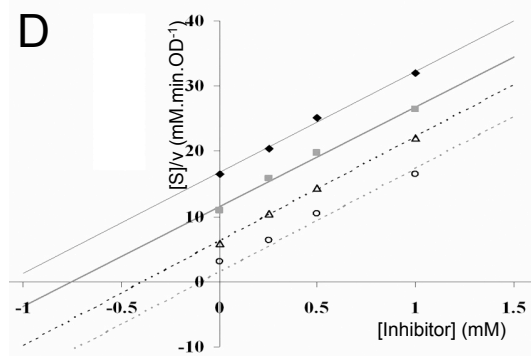

Supplement: pone.0047125.s002.pdf [file pone.0047125.s002.pdf]
