# Supplementary material for: Novel AChE Inhibitors for Sustainable Insecticide Resistance Management
Source: PubMed Central journal article supplement (PMC3466212; doi:10.1371/journal.pone.0047125), 2012-10-08
Supplement: pone.0047125.s003.pdf [file pone.0047125.s003.pdf]

**Table S1. Properties of PTF analogs.**

R<sub>1</sub>- R<sub>3</sub> and Q<sub>1</sub>- Q<sub>2</sub> are positions substituted as indicated in Figure 1. Groups A, B and F gather compounds that differ only in R<sub>2</sub>, groups C and D, only in R<sub>3</sub>, group E, only in Q<sub>1</sub>. Group F gathers compounds that differ from other groups in Q<sub>2</sub>. IC<sub>50</sub> values were determined on recombinant wild-type (WT) and OP-insensitive (G119S) *C. pipiens* AChE1 as described in Material and Methods. The R<sub>IC50</sub> ratio indicates the specificity towards G119S AChE1 (IC<sub>50</sub>WT/ IC<sub>50</sub>G119S). Mortality was measured from bioassays on Slab (OP-sensitive) and SR (OP-insensitive) *C. pipiens* strains treated for 24 hours with 300 mM PTF. Two to five replicates were performed and standard errors (all below 10%) were removed for clarity. The R<sub>m300</sub> ratio (SR mortality to Slab mortality) represents the specificity of PTFs at 300 mM towards the SR strain. Data from tacrine, propoxur, chlorpyrifos-oxon, paraoxon and dichlorvos are shown as control AChE inhibitors.

| Groupe A |               | Chemical group (position) |                                                                                     |                 |                |                | IC <sub>50</sub> (μM) |       |                   | Mortality at 300 μM |      |                   |
|----------|---------------|---------------------------|-------------------------------------------------------------------------------------|-----------------|----------------|----------------|-----------------------|-------|-------------------|---------------------|------|-------------------|
| PTF- N°  | Chembridge ID | R <sub>1</sub>            | R <sub>2</sub>                                                                      | R <sub>3</sub>  | Q <sub>1</sub> | Q <sub>2</sub> | WT                    | G119S | R <sub>IC50</sub> | Slab                | SR   | R <sub>m300</sub> |
| 1        | 6624438       | H                         | 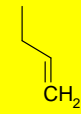   | CH <sub>3</sub> | O              | O              | 3.0                   | 2.2   | 1.4               | 0%                  | 0%   | -                 |
| 2        | 6527192       | H                         |    | CH <sub>3</sub> | O              | O              | 12.6                  | 5.5   | 2.3               | 12%                 | 53%  | 4.4               |
| 3        | 5809912       | H                         |   | CH <sub>3</sub> | O              | O              | 29.4                  | 6.2   | 5.0               | 43%                 | 78%  | 1.8               |
| 4        | 5810115       | H                         |  | CH <sub>3</sub> | O              | O              | 111.0                 | 14.0  | 8.0               | 78%                 | 100% | 1.3               |
| 5        | 5810021       | H                         |  | CH <sub>3</sub> | O              | O              | 1.4                   | 1.1   | 1.3               | 0%                  | 0%   | -                 |
| 6        | 5810152       | H                         |  | CH <sub>3</sub> | O              | O              | 4.0                   | 4.4   | 0.9               | 0%                  | 0%   | -                 |
| 7        | 6357191       | H                         |  | CH <sub>3</sub> | O              | O              | 424.0                 | 35.0  | 12.0              | 100%                | 100% | 1.0               |
| 8        | 7044564       | H                         |  | CH <sub>3</sub> | O              | O              | 312.0                 | 19.0  | 16.0              | 60%                 | 100% | 1.7               |
| 9        | 5960869       | H                         |  | CH <sub>3</sub> | O              | O              | 132.0                 | 21.5  | 6.0               | 19%                 | 39%  | 2.1               |
| 10       | 5809948       | H                         |  | CH <sub>3</sub> | O              | O              | 592.0                 | 81.4  | 7.0               | 14%                 | 87%  | 6.2               |

|    |         |   |                                                                                     |                 |   |   |       |      |      |     |      |     |
|----|---------|---|-------------------------------------------------------------------------------------|-----------------|---|---|-------|------|------|-----|------|-----|
| 11 | 5809984 | H | 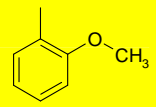   | CH <sub>3</sub> | O | O | 1.3   | 1.0  | 1.4  | 0%  | 0%   | -   |
| 12 | 5810198 | H |    | CH <sub>3</sub> | O | O | 54.0  | 6.0  | 9.0  | 46% | 88%  | 1.9 |
| 13 | 5993354 | H |    | CH <sub>3</sub> | O | O | 236.0 | 89.0 | 3.0  | 64% | 96%  | 1.5 |
| 14 | 6237811 | H |    | CH <sub>3</sub> | O | O | 2.0   | 2.0  | 1.0  | 0%  | 0%   | -   |
| 15 | 6434558 | H |    | CH <sub>3</sub> | O | O | 9.0   | 12.9 | 0.7  | 0%  | 0%   | -   |
| 16 | 6369764 | H |    | CH <sub>3</sub> | O | O | 260.0 | 37.0 | 7.0  | 80% | 100% | 1.3 |
| 17 | 8068010 | H |   | CH <sub>3</sub> | O | O | 5.0   | 8.0  | 0.6  | 15% | 90%  | 6.0 |
| 18 | 6627875 | H |  | CH <sub>3</sub> | O | O | 5.3   | 1.8  | 2.9  | 0%  | 0%   | -   |
| 19 | 6632183 | H |  | CH <sub>3</sub> | O | O | 3.3   | 3.7  | 0.9  | 0%  | 0%   | -   |
| 20 | 5810058 | H |  | CH <sub>3</sub> | O | O | 330.0 | 27.5 | 12.0 | 43% | 94%  | 2.2 |
| 21 | 7367799 | H |  | CH <sub>3</sub> | O | O | 5.0   | 4.8  | 1.0  | 0%  | 0%   | -   |
| 22 | 5997811 | H |  | CH <sub>3</sub> | O | O | 1.5   | 1.9  | 0.8  | 68% | 97%  | 1.4 |

### Groupe B

| PTF- Chembridge |         | Chemical group (position) |                                                                                     |                 |                |                | IC <sub>50</sub> (μM) |       |                   | Mortality at 300 μM |     |                   |
|-----------------|---------|---------------------------|-------------------------------------------------------------------------------------|-----------------|----------------|----------------|-----------------------|-------|-------------------|---------------------|-----|-------------------|
| N°              | ID      | R <sub>1</sub>            | R <sub>2</sub>                                                                      | R <sub>3</sub>  | Q <sub>1</sub> | Q <sub>2</sub> | WT                    | G119S | R <sub>IC50</sub> | Slab                | SR  | R <sub>m300</sub> |
| 23              | 7113388 | H                         | 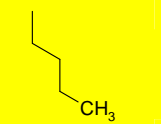   | CH <sub>3</sub> | S              | O              | 12.1                  | 15.5  | 0.8               | 24%                 | 60% | 2.5               |
| 24              | 6014971 | H                         |    | CH <sub>3</sub> | S              | O              | 1.3                   | 1.9   | 0.7               | 0%                  | 0%  | -                 |
| 25              | 5810154 | H                         |    | CH <sub>3</sub> | S              | O              | 442.0                 | 28.6  | 15.0              | 32%                 | 68% | 2.1               |
| 26              | 6631273 | H                         |    | CH <sub>3</sub> | S              | O              | 9.0                   | 16.0  | 0.6               | 100%                | 65% | 0.7               |
| 27              | 5809951 | H                         |    | CH <sub>3</sub> | S              | O              | 1.7                   | 5.9   | 0.2               | 12%                 | 15% | 1.3               |
| 28              | 5809987 | H                         |    | CH <sub>3</sub> | S              | O              | 2.1                   | 1.8   | 1.1               | 0%                  | 0%  | -                 |
| 29              | 5810201 | H                         |   | CH <sub>3</sub> | S              | O              | 118.0                 | 33.5  | 4.0               | 27%                 | 63% | 2.3               |
| 30              | 6629858 | H                         |  | CH <sub>3</sub> | S              | O              | 2.8                   | 1.3   | 2.2               | 25%                 | 25% | 1.0               |
| 31              | 6431063 | H                         |  | CH <sub>3</sub> | S              | O              | 0.5                   | 0.2   | 2                 | 20%                 | 20% | 1.0               |
| 32              | 6942871 | H                         |  | CH <sub>3</sub> | S              | O              | 2.1                   | 2.3   | 0.9.0             | 0%                  | 0%  | -                 |
| 33              | 6316393 | H                         |  | CH <sub>3</sub> | S              | O              | 490.0                 | 22.0  | 22.0              | 16%                 | 77% | 4.8               |
| 34              | 7118489 | H                         |  | CH <sub>3</sub> | S              | O              | 24.0                  | 38.0  | 0.6               | 0%                  | 0%  | -                 |
| 35              | 6028908 | H                         |  | CH <sub>3</sub> | S              | O              | 8.7                   | 8.7   | 1.0               | 5%                  | 49% | 9.8               |
| 36              | 6240216 | H                         |  | CH <sub>3</sub> | S              | O              | 11.8                  | 8.0   | 1.5               | 30%                 | 40% | 1.3               |
| 37              | 6001277 | H                         |  | CH <sub>3</sub> | S              | O              | 2121.0                | 142.0 | 15.0              | 0%                  | 35% | -                 |

**Groupe C**

| PTF- Chembridge |         | Chemical group (position) |                 |                                                                                     |                |                | IC <sub>50</sub> (μM) |        |                   | Mortality at 300 μM |     |                   |
|-----------------|---------|---------------------------|-----------------|-------------------------------------------------------------------------------------|----------------|----------------|-----------------------|--------|-------------------|---------------------|-----|-------------------|
| N°              | ID      | R <sub>1</sub>            | R <sub>2</sub>  | R <sub>3</sub>                                                                      | Q <sub>1</sub> | Q <sub>2</sub> | WT                    | G119S  | R <sub>IC50</sub> | Slab                | SR  | R <sub>m300</sub> |
| 38              | 5174670 | CH <sub>3</sub>           | CH <sub>3</sub> | H                                                                                   | O              | O              | 1189.0                | 357.0  | 3.3               | 70%                 | 90% | 1.3               |
| 39              | 5850181 | CH <sub>3</sub>           | CH <sub>3</sub> | CH <sub>3</sub>                                                                     | O              | O              | 74.3                  | 7.5    | 10.0              | 29%                 | 81% | 2.8               |
| 40              | 8045830 | CH <sub>3</sub>           | CH <sub>3</sub> | NO <sub>2</sub> -                                                                   | O              | O              | 83.0                  | 55.0   | 1.5               | 0%                  | 0%  | -                 |
| 41              | 6569943 | CH <sub>3</sub>           | CH <sub>3</sub> | 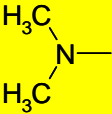   | O              | O              | 175.0                 | 132.0  | 1.3               | 20%                 | 20% | 1.0               |
| 42              | 6433806 | CH <sub>3</sub>           | CH <sub>3</sub> |    | O              | O              | 720.0                 | 1035.0 | 0.7               | 0%                  | 0%  | -                 |
| 43              | 5376777 | CH <sub>3</sub>           | CH <sub>3</sub> |   | O              | O              | 6.7                   | 8.3    | 0.8               | 0%                  | 0%  | -                 |
| 44              | 5377448 | CH <sub>3</sub>           | CH <sub>3</sub> |  | O              | O              | 0.6                   | 0.6    | 1.1               | 0%                  | 0%  | -                 |
| 45              | 6522729 | CH <sub>3</sub>           | CH <sub>3</sub> |  | O              | O              | 3.4                   | 1.1    | 3.1               | 0%                  | 0%  | -                 |
| 46              | 5527784 | CH <sub>3</sub>           | CH <sub>3</sub> |  | O              | O              | 1.7                   | 5.2    | 0.3               | 0%                  | 0%  | -                 |
| 47              | 6064049 | CH <sub>3</sub>           | CH <sub>3</sub> |  | O              | O              | 3.0                   | 1.3    | 2.3               | 0%                  | 0%  | -                 |
| 48              | 6318867 | CH <sub>3</sub>           | CH <sub>3</sub> |  | O              | O              | 755.0                 | 1525.0 | 0.5               | 0%                  | 0%  | -                 |
| 49              | 6320092 | CH <sub>3</sub>           | CH <sub>3</sub> |  | O              | O              | 97.0                  | 65.5   | 1.5               | 13%                 | 0%  | 0                 |
| 50              | 6510665 | CH <sub>3</sub>           | CH <sub>3</sub> |  | O              | O              | 260.0                 | 145.0  | 1.8               | 0%                  | 0%  | -                 |

|    |         |                 |                 |                                                                                   |   |   |       |        |     |    |    |   |
|----|---------|-----------------|-----------------|-----------------------------------------------------------------------------------|---|---|-------|--------|-----|----|----|---|
| 51 | 6422017 | CH <sub>3</sub> | CH <sub>3</sub> | 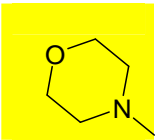 | O | O | 413.5 | 1500.0 | 0.3 | 0% | 0% | - |
| 52 | 6584174 | CH <sub>3</sub> | CH <sub>3</sub> |  | O | O | 860.0 | 52.0   | 17  | 0% | 0% | - |
| 53 | 7095782 | CH <sub>3</sub> | CH <sub>3</sub> |  | O | O | 0.6   | 5.6    | 0.1 | 0% | 0% | - |

### Groupe D

| PTF- Chembridge |         | Chemical group (position) |                                                                                     |                                                                                     |                |                | IC <sub>50</sub> (μM) |        |                   | Mortality at 300 μM |      |                   |
|-----------------|---------|---------------------------|-------------------------------------------------------------------------------------|-------------------------------------------------------------------------------------|----------------|----------------|-----------------------|--------|-------------------|---------------------|------|-------------------|
| N°              | ID      | R <sub>1</sub>            | R <sub>2</sub>                                                                      | R <sub>3</sub>                                                                      | Q <sub>1</sub> | Q <sub>2</sub> | WT                    | G119S  | R <sub>IC50</sub> | Slab                | SR   | R <sub>m300</sub> |
| 3               | 5809912 | H                         | 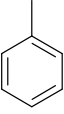   | CH <sub>3</sub>                                                                     | O              | O              | 29.4                  | 6.2    | 5.0               | 43%                 | 78%  | 1.8               |
| 54              | 5174640 | H                         |    | H                                                                                   | O              | O              | 1394.0                | 737.0  | 1.9               | 100%                | 100% | 1.0               |
| 55              | 5963881 | H                         |    | Br                                                                                  | O              | O              | 17.0                  | 32.6   | 0.5               | 0%                  | 0%   | -                 |
| 56              | 5968871 | H                         |    |    | O              | O              | 4.9                   | 1.9    | 2.6               | 0%                  | 0%   | -                 |
| 57              | 5981137 | H                         |    |    | O              | O              | 11.3                  | 5.4    | 2.1               | 0%                  | 0%   | -                 |
| 58              | 5988008 | H                         |   |   | O              | O              | 6.7                   | 9.3    | 0.7               | 0%                  | 0%   | -                 |
| 59              | 6026239 | H                         |  |  | O              | O              | 45.7                  | 18.5   | 2.5               | 0%                  | 0%   | -                 |
| 60              | 6054450 | H                         |  |  | O              | O              | 7.7                   | 1.1    | 6.8               | 50%                 | 50%  | 1.0               |
| 61              | 6347471 | H                         |  |  | O              | O              | 124.5                 | 1500.0 | 0.1               | 0%                  | 0%   | -                 |
| 62              | 6191422 | H                         |  |  | O              | O              | 197.0                 | 345.0  | 0.6               | 0%                  | 0%   | -                 |

### Groupe E

| PTF- Chembridge |         | Chemical group (position) |                                                                                   |                |                                    |                | IC <sub>50</sub> (μM) |       |                   | Mortality at 300 μM |      |                   |
|-----------------|---------|---------------------------|-----------------------------------------------------------------------------------|----------------|------------------------------------|----------------|-----------------------|-------|-------------------|---------------------|------|-------------------|
| N°              | ID      | R <sub>1</sub>            | R <sub>2</sub>                                                                    | R <sub>3</sub> | Q <sub>1</sub>                     | Q <sub>2</sub> | WT                    | G119S | R <sub>IC50</sub> | Slab                | SR   | R <sub>m300</sub> |
| 54              | 5174640 | H                         | 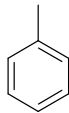 | H              | O                                  | O              | 1394.0                | 737.0 | 1.9               | 100%                | 100% | 1.0               |
| 63              | 5909147 | H                         |  | H              | S                                  | O              | 151.0                 | 98.0  | 1.5               | 0%                  | 0%   | -                 |
| 64              | 5809918 | H                         |  | H              | N                                  | O              | 56.0                  | 49.5  | 1.1               | 0%                  | 0%   | -                 |
| 65              | 7171019 | H                         |  | H              | N-C(CH <sub>3</sub> ) <sub>3</sub> | O              | 37.0                  | 22.0  | 1.7               | 0%                  | 0%   | -                 |

### Groupe F

| PTF- Chembridge |         | Chemical group (position) |                                                                                     |                                                                                     |                |                | IC <sub>50</sub> (μM) |        |                   | Mortality at 300 μM |      |                   |
|-----------------|---------|---------------------------|-------------------------------------------------------------------------------------|-------------------------------------------------------------------------------------|----------------|----------------|-----------------------|--------|-------------------|---------------------|------|-------------------|
| N°              | ID      | R <sub>1</sub>            | R <sub>2</sub>                                                                      | R <sub>3</sub>                                                                      | Q <sub>1</sub> | Q <sub>2</sub> | WT                    | G119S  | R <sub>IC50</sub> | Slab                | SR   | R <sub>m300</sub> |
| 66              | 5975904 | H                         | 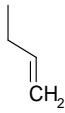 | CH <sub>3</sub>                                                                     | O              | S              | 91.6                  | 51.0   | 2.0               | 63%                 | 100% | 1.6               |
| 67              | 5555858 | H                         |  | H                                                                                   | O              | S              | 9.1                   | 11.2   | 0.8               | 0%                  | 0%   | -                 |
| 68              | 5810426 | H                         |  | CH <sub>3</sub>                                                                     | O              | S              | 4.0                   | 5.0    | 0.8               | 89%                 | 95%  | 1.1               |
| 69              | 5910400 | H                         |  |  | O              | S              | 43.9                  | 4.6    | 10.0              | 0%                  | 0%   | -                 |
| 70              | 6325670 | H                         |  |  | O              | S              | 18.0                  | 6.2    | 2.9               | 0%                  | 0%   | -                 |
| 71              | 6393518 | H                         |  |  | O              | S              | 4495.0                | 2475.0 | 1.8               | 0%                  | 0%   | -                 |

### Control AChE inhibitors

| Inhibitor         | Structure                                                                         | IC <sub>50</sub> (μM) |         |                   | Mortality at 300 μM |      |                   |
|-------------------|-----------------------------------------------------------------------------------|-----------------------|---------|-------------------|---------------------|------|-------------------|
|                   |                                                                                   | WT                    | G119S   | R <sub>IC50</sub> | Slab                | SR   | R <sub>m300</sub> |
| Tacrine           | 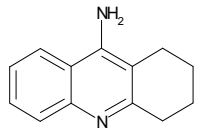 | 7.4                   | 1150.0  | 0.01              | 85%                 | 95%  | 3.0               |
| Propoxur          |  | 0.3                   | 26500.0 | 10 <sup>-5</sup>  | 100%                | 0%   | 1.9               |
| Chlorpyrifos-oxon |  | 0.01                  | 8.6     | 0.002             | 100%                | 100% | 3.4               |
| Paraoxon          |  | 0.17                  | 20.3    | 0.008             | 100%                | 100% | 2                 |
| Dichlorvos        |  | 0.45                  | 2.0     | 0.2               | 100%                | 100% | 0.7               |
