# Supplementary material for: Novel AChE Inhibitors for Sustainable Insecticide Resistance Management
Source: PubMed Central journal article supplement (PMC3466212; doi:10.1371/journal.pone.0047125), 2012-10-08
Supplement: pone.0047125.s004.pdf [file pone.0047125.s004.pdf]

**Table S2. Activities of PTFs on G119S, F290V and F331W OP-insensitive AChE1.**

| PTF <sup>a</sup> | IC <sub>50</sub> (μM) <sup>b</sup> |       | R <sub>IC50</sub> | IC <sub>50</sub> (μM) <sup>b</sup> |       | R <sub>IC50</sub> | IC <sub>50</sub> (μM) <sup>b</sup> |       | R <sub>IC50</sub> |
|------------------|------------------------------------|-------|-------------------|------------------------------------|-------|-------------------|------------------------------------|-------|-------------------|
|                  | WT                                 | G119S |                   | (WT/G119S)                         | F290V |                   | (WT/F290V)                         | F331W |                   |
| 3                | 29.4                               | 6.2   | 5                 | 12.4                               | 2     | 17.8              | 2                                  |       |                   |
| 10               | 592.0                              | 81.4  | 7                 | 85.9                               | 7     | 88.2              | 7                                  |       |                   |
| 20               | 330.0                              | 27.5  | 12                | 14.5                               | 23    | 8.3               | 40                                 |       |                   |
| 25               | 442.0                              | 28.6  | 15                | 39.3                               | 12    | 31.9              | 14                                 |       |                   |
| 29               | 118.0                              | 33.5  | 4                 | 37.4                               | 3     | 11.2              | 11                                 |       |                   |
| 39               | 74.3                               | 7.6   | 10                | 13.9                               | 5     | 8.7               | 9                                  |       |                   |

<sup>a</sup> numbers refer to Table S1

<sup>b</sup> IC<sub>50</sub> values were determined from regression analysis of log-concentrations versus percentage inhibitions. R<sub>IC50</sub> = IC<sub>50</sub> WT / IC<sub>50</sub> G119S, F290V or F331W
