# Supplementary material for: Novel AChE Inhibitors for Sustainable Insecticide Resistance Management
Source: PubMed Central journal article supplement (PMC3466212; doi:10.1371/journal.pone.0047125), 2012-10-08
Supplement: pone.0047125.s005.pdf [file pone.0047125.s005.pdf]

**Table S3. Dissociation constants ( $K_{ic}$ ) of enzyme-inhibitor complexes.**

| PTF <sup>a</sup>     | $K_{ic}$ ( $\mu\text{M}$ ) <sup>b</sup> |                | $R_{K_{ic}}$<br>(WT/G119S) |
|----------------------|-----------------------------------------|----------------|----------------------------|
|                      | WT                                      | G119S          |                            |
| 3                    | 126.6 $\pm$ 2.8                         | 21.8 $\pm$ 1.9 | 5.8                        |
| 10                   | 88.2 $\pm$ 4.2                          | 64.5 $\pm$ 1.8 | 1.4                        |
| 20                   | 56.1 $\pm$ 1.8                          | 5.6 $\pm$ 0.1  | 10.0                       |
| 25                   | 131.3 $\pm$ 3.1                         | 24.9 $\pm$ 0.6 | 5.3                        |
| 29                   | 17.1 $\pm$ 6.8                          | 8.9 $\pm$ 2.7  | 1.4                        |
| 39                   | 130.2 $\pm$ 9.2                         | 41.9 $\pm$ 2.3 | 3.1                        |
| Tacrine <sup>c</sup> | 2.7 $\pm$ 0.3                           | 4.4 $\pm$ 0.1  | 0.6                        |

<sup>a</sup> numbers refer to Table S1

<sup>b</sup> data were measured from five independent replicates.

<sup>c</sup> competitive inhibitor reference
